# Supplementary material
Source: bioRxiv or medRxiv preprint supplement (https://www.biorxiv.org/highwire/filestream/125689/field_highwire_adjunct_files/8/416701-8.pdf)
Supplement: Supplementary file [file 416701-8.pdf]

| <b>Coefficient</b>         | <b>Value</b>                                                 | <b>Reference</b> |
|----------------------------|--------------------------------------------------------------|------------------|
| <b><i>Heterotrophs</i></b> |                                                              |                  |
| $\mu_{Hmax}$               | $4 \text{ d}^{-1}$                                           | (1)              |
| $b_H$                      | $0.2 \text{ d}^{-1}$                                         | (2)              |
| $K_{OH}$                   | $0.2 \text{ gO}_2 \text{ m}^{-3}$                            | (2)              |
| $K_C$                      | $5 \text{ gCOD}_{SC} \text{ m}^{-3}$                         | (1)              |
| $Y_H$                      | $0.67 \text{ gCOD}_{XH} \text{ g}^{-1} \text{COD}_{SC}$      | (1)              |
|                            |                                                              |                  |
| <b><i>AOB</i></b>          |                                                              |                  |
| $\mu_{Amax}$               | $1.4 \text{ d}^{-1}$                                         | (3)              |
| $b_A$                      | $0.3 \text{ d}^{-1}$                                         | (3)              |
| $K_{OA}$                   | $0.3 \text{ gO}_2 \text{ m}^{-3}$                            | (4)              |
| $K_A$                      | $2.4 \text{ gN m}^{-3}$                                      | (4)              |
| $Y_A$                      | $0.15 \text{ gCOD}_{XA} \text{ g}^{-1} \text{N}$             | (4)              |
|                            |                                                              |                  |
| <b><i>NOB</i></b>          |                                                              |                  |
| $\mu_{Nmax}$               | $1.1 \text{ d}^{-1}$                                         | (4)              |
| $b_N$                      | $0.2 \text{ d}^{-1}$                                         | (3)              |
| $K_{ON}$                   | $0.1 \text{ gO}_2 \text{ m}^{-3}$                            | (4)              |
| $K_N$                      | $0.238 \text{ gN m}^{-3}$                                    | (4)              |
| $Y_N$                      | $0.041 \text{ gCOD}_{XN} \text{ g}^{-1} \text{N}$            | (4)              |
|                            |                                                              |                  |
| <b><i>Other</i></b>        |                                                              |                  |
| $f_{XI}$                   | $0.2 \text{ gCOD}_{XI} \text{ g}^{-1} \text{COD}_{XH,XA,XN}$ | (5)              |
| $i_{NX}$                   | $0.07 \text{ gN g}^{-1} \text{COD}_{XH,XA,XN}$               | (5)              |

## References

1. Gujer W, Henze M. 1991. Activated Sludge Modelling and Simulation. Water Science and Technology 23:1011-1023.
2. Gujer W, Henze M, Mino T, Loosdrecht Mv. 1999. Activated sludge model No. 3. Water Science and Technology 39:183-193.
3. Moussa MS, Hooijmans CM, Lubberding HJ, Gijzen HJ, van Loosdrecht MCM. 2005. Modelling nitrification, heterotrophic growth and predation in activated sludge. Water Research 39:5080-5098.
4. de Kreuk MK, Picioreanu C, Hosseini M, Xavier JB, van Loosdrecht MCM. 2007. Kinetic model of a granular sludge SBR: Influences on nutrient removal. Biotechnology and Bioengineering 97:801-815.
5. Henze M, Gujer W, Mino T, van Loosdrecht M. 2000. Activated Sludge Models ASM1, ASM2, ASM2D, ASM3, vol 5. IWA publishing, London, UK.
